# Supplementary material for: Utilising ionic liquids for the in situ swelling of Avicel towards enhanced enzymatic saccharification
Source: Royal Society of Chemistry journal article supplement (doi:10.1039/c5ra11123d), 2015-01-01
Supplement: c5ra11123d1.pdf [file c5ra11123d1.pdf]

**Utilising ionic liquids for the *in situ* swelling of Avicel towards enhanced enzymatic saccharification.**

San Mei Bong<sup>a</sup> Kylie Vongsanga<sup>a</sup> and Nolene Byrne<sup>a\*</sup>

**Experimental method**

*Materials*

Choline hydroxide (45 % solution in methanol), choline hydroxide (46 % solution in water), propionic acid (>99.5 %), hexanoic acid (>99.5 %), sodium acetate (anhydrous, 99 %), D-(+)-glucose (>99.5 %), 3,5-dinitrosalicylic acid (>98 %), sodium potassium tartrate (99 %), Avicel® PH-101 crystallinity ~75% and the enzyme, cellulase from *Aspergillus Niger* (~0.8 U/mg) were purchased from Sigma-Aldrich. Glacial acetic acid (99.7 %), citric acid (monohydrate, 99.5 %) and sodium hydroxide (98 %) were purchased from Chem-Supply. Choline acetate (98%) was purchased from IoLiTec Ionic Liquids Technologies GmbH. All chemicals were used as received without further purification.

*Synthesis of cholinium ionic liquids*

The cholinium ionic liquids were synthesised by neutralisation as previously described in the literature.<sup>1-4</sup> In brief, to a magnetically stirred choline hydroxide solution in an ice bath, an equimolar amount of carboxylic acid (glacial acetic acid, propionic acid or hexanoic acid) was slowly added drop-wise. The mixture was allowed to stir overnight at room temperature. The bulk solvent was then removed using a rotary evaporator at 40 °C and further dried under reduced pressure at 60 °C. The water content was analysed using a Karl-Fischer coulometer and determined to be <1 wt%.

*Choline acetate*

<sup>1</sup>H NMR (270 MHz, DMSO-<sub>d</sub>6), δ (ppm): 1.59 (3H, s, CH<sub>3</sub>), 3.13 (9H, s, 3 x CH<sub>3</sub>), 3.42 (2H, m, CH<sub>2</sub>), 3.81 (2H, m, CH<sub>2</sub>)

*Choline propionate*

<sup>1</sup>H NMR (270 MHz, DMSO-<sub>d</sub>6), δ (ppm): 0.88 (3H, t, CH<sub>3</sub>), 1.84 (2H, q, CH<sub>2</sub>CH<sub>3</sub>), 3.14 (9H, s, 3 x NCH<sub>3</sub>), 3.43 (2H, m, NCH<sub>2</sub>), 3.83 (2H, m, CH<sub>2</sub>OH)

*Choline hexanoate*

<sup>1</sup>H NMR (270 MHz, CDCl<sub>3</sub>), δ (ppm): 0.78 (3H, t, CH<sub>3</sub>), 1.19 (4H, m, CH<sub>2</sub>CH<sub>2</sub>CH<sub>3</sub>), 1.48 (2H, m, CH<sub>2</sub>CH<sub>2</sub>CH<sub>2</sub>CH<sub>3</sub>), 2.04 (2H, t, CO<sub>2</sub>CH<sub>2</sub>), 3.27 (9H, s, 3 x NCH<sub>3</sub>), 3.60 (2H, m, NCH<sub>2</sub>), 3.99 (2H, m, CH<sub>2</sub>OH)

*Enzyme hydrolysis reaction*

Solutions were prepared by diluting the select IL with water to make concentrations of 100 %, 80 %, 60 %, 40 % and 20 % IL: water solutions (v/v if liquid and w/v if solid).

Avicel PH-101 (5 wt %) was added to each IL solution and incubated with magnetic stirring in a water bath (50 °C) for 1 hour to ensure homogeneous mixing. An enzyme solution (6 U/mL) was added to the mixture making the final enzyme concentration of 0.66 U/mL and further incubated for 20 minutes.

A similar setup as the above was adapted for the incubation temperature of 80 °C and was carried out using a heat block instead of a water bath. Incubation times varied from 20, 40 and 60 minutes. Samples were analysed via the DNS method and HPLC.

*Glucose degradation reaction*

[Cho][Pn] (2 g) was added to vial and stirred and heated at 80 °C. Glucose (20 wt%) and water (10 wt%) were then added to the IL. The reaction mixture was periodically sampled and quenched in an ice bath. Samples were analysed by HPLC.

**Sample Analysis**

*DNS Method*

The DNS reagent was prepared using 3, 5-dinitrosalicylic acid (1 g) and sodium potassium tartrate (3 g) in a sodium hydroxide solution (0.4 mM) to make a total volume of 100 mL. The DNS reagent were stored in a refrigerator in between experiments. Glucose standards were prepared from a glucose stock solution (500 µg/mL) to produce a calibration curve. Samples (0.5 mL) were diluted with water (2.5 mL) and DNS reagent (1 mL) was added. Prepared samples and standards were boiled in a water bath for 10 minutes. After allowing to cool to room temperature, spectra were taken between 400 nm to 700 nm using a Cary 5000 UV/VIS spectrophotometer where the data point was taken at 540 nm.

Soluble sugars per mL were calculated using a calibration curve derived from the standards. Relative soluble sugars were calculated using the equation as follows:

$$\text{Relative soluble sugars} = \frac{\text{Soluble sugars of Samples (mg/mL)}}{\text{Soluble sugars of NaOAc buffer (mg/mL)}}$$

Negative controls, in the absence of enzyme where measured no soluble sugars where detected.

#### HPLC

In the one-pot hydrolysis, the samples were diluted (x10 dilution) during sampling (150  $\mu$ L) and centrifuged in eppendorf tubes (1.5 mL) for 30 minutes before HPLC analysis. Samples collected to study glucose degradation were similarly diluted (x10 dilution). Samples were micro-filtered using nylon filters (0.45  $\mu$ m) and transferred into HPLC sample vials. The samples were analysed using an Agilent 1260 Infinity HPLC system equipped with a refractive index detector, fitted with ion-exclusion, Aminex HPX-87H column (300 x 7.8 mm, 10 mM H<sub>2</sub>SO<sub>4</sub>, 0.6 mL/min, 55 °C and 40 minute acquisition time) equipped with a guard cartridge (cation H<sup>+</sup>). The glucose standards for calibration were prepared at 0.1, 1.0, 2.0, 3.0 and 4.0 mg/mL and all samples were run with an internal standard of citric acid present.

#### POM

Avicel in the choline IL's were observed using a Nikon i80 polarised optical microscope (POM) using x10 and x20 magnification. Avicel (5 wt%) in the IL was heated and stirred at 80 °C for [Cho][Pn] and [Cho][Hex] and 90 °C for [Cho][OAc] (due to the melting point of the IL) for 1 hour. After 1 hour, a sample of the mixture was removed, placed on a glass slide and observed using the POM and an image captured.

#### FT-IR

The infrared spectra were obtained using a Bruker LUMOS FT-IR microscope. The infrared spectra were recorded using attenuated total reflectance mode (ATR) in the range of 4000-600 cm<sup>-1</sup>. The scans were averaged from 128 scans at a resolution of 4 cm<sup>-1</sup>. Spectra were then baseline corrected and normalised to the 1022 cm<sup>-1</sup> peak.

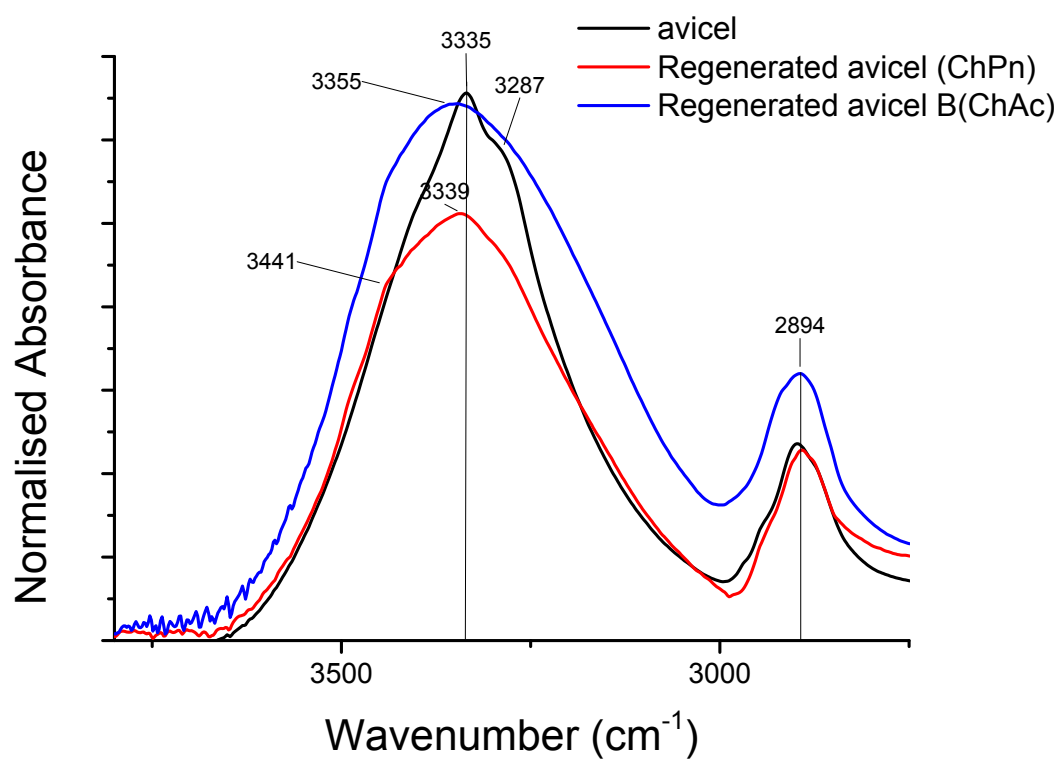

**Fig.S.1** Enlargement of the hydrogen bonded –OH (3335 cm<sup>-1</sup>) and –CH (2894 cm<sup>-1</sup>) regions, comparing pre-treated Avicel with native Avicel.

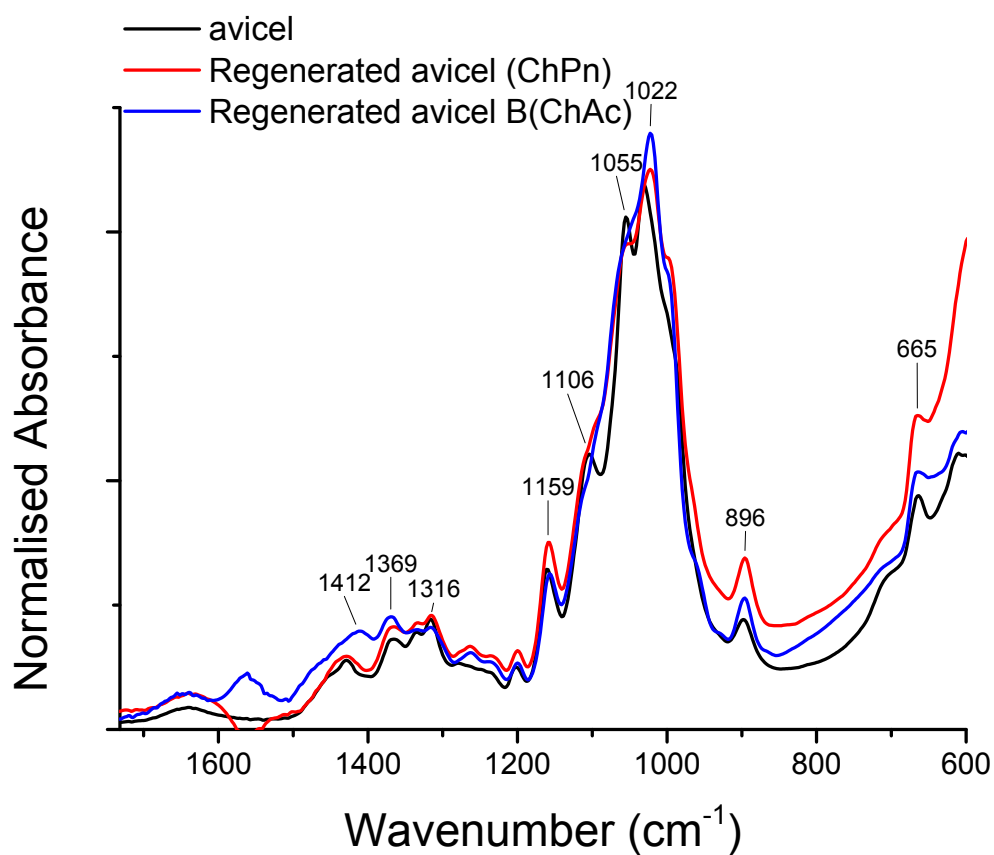

**Fig.S.2** Enlargement at the lower wavenumber regions, comparing pre-treated Avicel with native Avicel.

## REFERENCES

1. Y. Fukaya, Y. Iizuka, K. Sekikawa and H. Ohno, *Green Chemistry*, 2007, **9**, 1155-1157.
2. O. Winther-Jensen, R. Vijayaraghavan, J. Sun, B. Winther-Jensen and D. R. MacFarlane, *Chemical Communications*, 2009, 3041-3043.
3. M. Petkovic, J. L. Ferguson, H. Q. N. Gunaratne, R. Ferreira, M. C. Leita, K. R. Seddon, L. P. N. Rebelo and C. S. Pereira, *Green Chemistry*, 2010, **12**, 643-649.
4. N. Muhammad, M. I. Hossain, Z. Man, M. El-Harbawi, M. A. Bustam, Y. A. Noaman, N. B. Mohamed Alitheen, M. K. Ng, G. Hefter and C.-Y. Yin, *Journal of Chemical & Engineering Data*, 2012, **57**, 2191-2196.
